# Supplementary material
Source: MDPI journal article supplement (https://www.mdpi.com/2073-445X/9/7/227)
Supplement: s1 [file s1]

# Unpacking Changing Multi-Actor and Multi-Level Actor Ties in Transformative Spaces: Insights from a Degraded Landscape, Machubeni, South Africa

Menelisi Falayi <sup>1,\*</sup>, James Gambiza <sup>1</sup> and Michael Schoon <sup>2</sup>

<sup>1</sup> Department of Environmental Science, Rhodes University, Makhanda 6140, South Africa; j.gambiza@ru.ac.za

<sup>2</sup> School of Sustainability, Arizona State University Tempe, Tempe, AZ 85287-5502, USA; michael.schoon@asu.edu

\* Correspondence: falayimenelisi@gmail.com

## Supplementary Material 1

**Table S1.** Design principles, interpretations, application in the Machubeni Case Study.

| Design Phase [32]                                 | Application and interpretation of principles per stage                                                                                                                                                                                                                                                                                                                                           |
|---------------------------------------------------|--------------------------------------------------------------------------------------------------------------------------------------------------------------------------------------------------------------------------------------------------------------------------------------------------------------------------------------------------------------------------------------------------|
| <b>Problem definition Phase</b>                   | The problem definition phase was conducted without imposition by the transformative space-makers. Different actors noted that the culture of collaboration was ineffective, and there was little knowledge sharing and learning across actors, sectors, and scales. The joint framing process resulted in the formulation of the transformative space called the Masibambisane multi-actor forum |
| <b>Operationalization phase</b>                   | <i>Types of participants</i><br>Actors involved in the Sustainable land management (SLM) project were convened.<br><i>Quality of participation</i><br>Actors involved in the SLM project were identified, and social network analysis was employed to examine the changing social-relational pattern of multi-actor and multi-level actor ties                                                   |
| <b>Tactical Phase: Methods and Tools</b>          | Social network analysis and qualitative methods were used to map and examine the changing horizontal and vertical multi-actor ties within a transformative space.                                                                                                                                                                                                                                |
| <b>Outcomes Phase: Measuring network dynamics</b> | See results section                                                                                                                                                                                                                                                                                                                                                                              |
| <b>Reflection Phase</b>                           | See results section                                                                                                                                                                                                                                                                                                                                                                              |

**Table S2.** Actor groups identified as members of the transformative space (Masibambisane multi-actor Forum).

| Scale                 | Name of Agency                                                         | ID            | Number of actors in Phase 1 (March 2018 to March 2019) | Number of actors in Phase 2 (April 2019 to March 2020) |
|-----------------------|------------------------------------------------------------------------|---------------|--------------------------------------------------------|--------------------------------------------------------|
| National              | Rhodes University                                                      | RU            | 13                                                     | 12                                                     |
| Provincial            | Department of Economic Development, Environmental Affairs, and Tourism | DEDEAT        | 4                                                      | 4                                                      |
| Provincial            | Department of Rural Development and Agrarian reform                    | DRDAR         | 4                                                      | 4                                                      |
| District Municipality | Chris Hani District Municipality                                       | CHDM          | 2                                                      | 0                                                      |
| Local Municipality    | Emalahleni Local Municipality                                          | EM            | 15                                                     | 12                                                     |
| Community-level       | Traditional leaders Council                                            | TLC           | 7                                                      | 7                                                      |
| Community-level       | Masibambisane Multi-actor Forum executive                              | MMF executive | 4                                                      | 4                                                      |
| Community-level       | GEF5 Community liaison officers                                        | CLO           | 2                                                      | 2                                                      |
| Community-level       | Conservation Agriculture Hub                                           | CA            | 12                                                     | 12                                                     |
| Community-level       | Land Rehabilitation Hub                                                | LR            | 17                                                     | 17                                                     |
| Community-level       | Rangeland Management Hub                                               | RG            | 13                                                     | 13                                                     |
| Community-level       | Training and Knowledge Hub                                             | TK            | 5                                                      | 5                                                      |
| Community-level       | Monitoring and Evaluation Hub                                          | ME            | 5                                                      | 5                                                      |
| Community-level       | Gender Equity Hub                                                      | GE            | 5                                                      | 5                                                      |
| Community-level       | Youth Hub                                                              | YH            | 5                                                      | 1                                                      |

**Table S3.** Centrality measures i.e. in-degree and betweenness over time (common goals).

| Phase 1                            |           |             | Phase 2   |             |
|------------------------------------|-----------|-------------|-----------|-------------|
| Actor groups                       | In-degree | Betweenness | In-degree | Betweenness |
| Rhodes University                  | 15        | 13.44       | 11        | 4.0861      |
| Conservation Agriculture           | 14        | 11.00       | 14        | 1.0179      |
| Land Rehabilitation                | 13        | 1.41        | 13        | 0.5818      |
| Rangeland Management               | 13        | 0.11        | 12        | 0.5818      |
| Training and knowledge sharing hub | 14        | 0.11        | 10        | 0.1818      |
| Monitoring and Evaluation Hub      | 14        | 0.11        | 13        | 0.1818      |
| Gender Equity Hub                  | 14        | 0.11        | 14        | 0.4920      |
| Traditional Leaders Council        | 14        | 0.11        | 14        | 1.0179      |
| DEDEAT                             | 7         | 0.10        | 14        | 1.4929      |
| Emalahleni municipality            | 4         | 0.01        | 4         | 0.1818      |
| DRDAR                              | 6         | 0.10        | 0         | 1.4929      |
| MMF exe.                           | 14        | 3.90        | 14        | 2.0172      |
| CLO                                | 14        | 8.10        | 14        | 1.8610      |
| Youth Hub                          | 8         | 2.00        | 14        | 1.8361      |
| Chris Hani District municipality   | 3         | 0.01        | 0         | 0           |

**Table S4.** Centrality measures i.e. in-degree and betweenness over time (information-sharing network).

| Phase 1                            |           |             | Phase 2   |             |
|------------------------------------|-----------|-------------|-----------|-------------|
| Actor                              | In-degree | Betweenness | In-degree | Betweenness |
| Rhodes University                  | 15        | 31.17       | 16        | 0.5         |
| Conservation Agriculture           | 9         | 9.54        | 13        | 1.2         |
| Land Rehabilitation                | 9         | 2.28        | 12        | 0.5         |
| Rangeland Management               | 10        | 5.92        | 12        | 0.5         |
| Training and knowledge sharing hub | 10        | 10.6        | 13        | 1.2         |
| Monitoring and Evaluation Hub      | 10        | 5.92        | 13        | 1.2         |
| Gender Equity Hub                  | 9         | 0.29        | 13        | 1.2         |
| Traditional Leaders Council        | 15        | 9.76        | 13        | 1.2         |
| DEDEAT                             | 1         | 0           | 13        | 0.5         |
| Emalahleni municipality            | 4         | 0           | 0         | 0           |
| DRDAR                              | 2         | 0           | 13        | 0.2         |
| MMF exe.                           | 12        | 3.92        | 12        | 1.2         |
| CLO                                | 12        | 3.92        | 13        | 0.5         |
| Youth Hub                          | 9         | 4.29        | 8         | 0           |
| Chris Hani District municipality   | 0         | 0           | 0         | 0           |

**Table 5.** Centrality measures i.e. in-degree and betweenness over time (Inter-organisational trust network).

| Phase 1                            |           |             | Phase 2   |             |
|------------------------------------|-----------|-------------|-----------|-------------|
| Actor                              | In-degree | Betweenness | In-degree | Betweenness |
| Rhodes University                  | 14        | 17.48       | 16        | 12.00       |
| Conservation Agriculture           | 11        | 4.47        | 12        | 4.8         |
| Land Rehabilitation                | 10        | 13.3        | 13        | 0.6         |
| Rangeland Management               | 11        | 2.78        | 12        | 0.6         |
| Training and knowledge sharing hub | 8         | 1.22        | 13        | 0.7         |
| Monitoring and Evaluation Hub      | 9         | 1.76        | 12        | 0.8         |
| Gender Equity Hub                  | 9         | 0.67        | 13        | 1.5         |
| Traditional Leaders Council        | 13        | 16.12       | 2         | 0           |
| DEDEAT                             | 9         | 5.32        | 12        | 0.8         |
| Emalahleni municipality            | 2         | 0.12        | 1         | 0           |
| DRDAR                              | 0         | 0           | 8         | 0.7         |
| MMF exe.                           | 11        | 1.59        | 13        | 1.5         |
| CLO                                | 11        | 2.23        | 13        | 1.5         |
| Youth Hub                          | 8         | 0.85        | 13        | 1.8         |
| Chris Hani District municipality   | 0         | 0           | 0         | 0           |

## References

32. Pereira, L.; Frantzeskaki, N.; Hebinck, A.; Charli-Joseph, L.; Drimie, S.; Dyer, M.; Eakin, H.; Galafassi, D.; Karpouzoglou, T.; Marshall, F.; et al. Transformative spaces in the making: key lessons from nine cases in the Global South. *Sustain. Sci.* **2019**, doi:10.1007/s11625-019-00749-x.
